# Supplementary material
Source: MDPI journal article supplement (https://www.mdpi.com/2073-4395/12/3/596)
Supplement: s1 [file s1]

**Table S3.** Chemical composition at 90 dpi in *Piper divaricatum* leaves inoculated with AMFs and concentrations of P (means  $\pm$  standard deviation).

| Compound                            | RI <sup>a</sup> | RI <sup>b</sup> | Control                           | AMF                              | P20                              | P200                              | P20 + AMF                        | P200 + AMF                       |
|-------------------------------------|-----------------|-----------------|-----------------------------------|----------------------------------|----------------------------------|-----------------------------------|----------------------------------|----------------------------------|
| Pentanol                            | 768             | 762             | 0.02 $\pm$ 0.04                   | 0.37 $\pm$ 0.75                  | 0.11 $\pm$ 0.21                  |                                   |                                  |                                  |
| 1-Octene                            | 787             | 788             | 1.16 $\pm$ 1.34                   | 0.35 $\pm$ 0.50                  | 0.63 $\pm$ 0.84                  | 1.02 $\pm$ 0.64                   | 1.15 $\pm$ 0.72                  | 0.98 $\pm$ 0.26                  |
| (E)-2-Hexenal                       | 845             | 846             | 0.05 $\pm$ 0.10                   | 0.03 $\pm$ 0.06                  | 0.11 $\pm$ 0.05                  | 0.14 $\pm$ 0.09                   |                                  | 0.09 $\pm$ 0.03                  |
| $\alpha$ -Pinene                    | 924             | 932             | 0.27 $\pm$ 0.26                   | 0.40 $\pm$ 0.47                  | 0.19 $\pm$ 0.10                  | 1.57 $\pm$ 2.69                   | 0.36 $\pm$ 0.15                  | 0.17 $\pm$ 0.09                  |
| Sabinene                            | 969             | 969             | 0.10 $\pm$ 0.16                   | 0.19 $\pm$ 0.28                  |                                  | 0.04 $\pm$ 0.08                   | 0.22 $\pm$ 0.11                  | 0.03 $\pm$ 0.07                  |
| $\beta$ -Pinene                     | 981             | 974             | 0.18 $\pm$ 0.24                   | 0.36 $\pm$ 0.48                  | 0.35 $\pm$ 0.39                  | 1.80 $\pm$ 3.24                   | 0.28 $\pm$ 0.15                  | 0.07 $\pm$ 0.09                  |
| Myrcene                             | 991             | 988             | 0.16 $\pm$ 0.20                   | 0.18 $\pm$ 0.12                  | 0.22 $\pm$ 0.12                  | 0.19 $\pm$ 0.13                   | 0.27 $\pm$ 0.22                  | 0.20 $\pm$ 0.10                  |
| $\beta$ -Phellandrene               | 1023            | 1025            | 0.34 $\pm$ 0.35                   | 0.35 $\pm$ 0.26                  | 0.09 $\pm$ 0.07                  | 0.17 $\pm$ 0.13                   | 0.47 $\pm$ 0.22                  | 0.11 $\pm$ 0.07                  |
| Z- $\beta$ -Ocimene                 | 1029            | 1032            | 0.21 $\pm$ 0.28                   | 0.34 $\pm$ 0.19                  | 0.19 $\pm$ 0.10                  | 0.54 $\pm$ 0.73                   | 0.37 $\pm$ 0.07                  | 0.15 $\pm$ 0.05                  |
| <b>E-<math>\beta</math>-Ocimene</b> | <b>1040</b>     | <b>1044</b>     | <b>6.13<math>\pm</math>2.23</b>   | <b>7.57<math>\pm</math>1.90</b>  | <b>5.91<math>\pm</math>2.30</b>  | <b>4.23<math>\pm</math>2.16</b>   | <b>7.97<math>\pm</math>1.62</b>  | <b>4.78<math>\pm</math>1.80</b>  |
| Allo-Ocimene                        | 1122            | 1128            | 0.14 $\pm$ 0.17                   | 0.16 $\pm$ 0.09                  | 0.10 $\pm$ 0.08                  | 0.03 $\pm$ 0.04                   | 0.18 $\pm$ 0.05                  | 0.06 $\pm$ 0.04                  |
| Myrtenol                            | 1201            | 1194            |                                   |                                  | 0.04 $\pm$ 0.06                  |                                   | 0.01 $\pm$ 0.00                  | 0.02 $\pm$ 0.03                  |
| $\delta$ -Elemene                   | 1333            | 1335            | 0.22 $\pm$ 0.25                   | 0.07 $\pm$ 0.07                  | 0.11 $\pm$ 0.07                  | 0.15 $\pm$ 0.14                   | 0.20 $\pm$ 0.12                  | 0.14 $\pm$ 0.04                  |
| Eugenol                             | 1354            | 1356            | 1.09 $\pm$ 1.26                   | 1.57 $\pm$ 1.27                  | 3.94 $\pm$ 6.23                  | 4.52 $\pm$ 3.58                   | 3.81 $\pm$ 4.53                  | 1.95 $\pm$ 1.20                  |
| $\alpha$ -Copaene                   | 1372            | 1374            | 0.07 $\pm$ 0.11                   | 0.01 $\pm$ 0.03                  | 0.02 $\pm$ 0.03                  | 0.02 $\pm$ 0.05                   | 0.10 $\pm$ 0.05                  | 0.01 $\pm$ 0.03                  |
| <b><math>\beta</math>-Elemene</b>   | <b>1381</b>     | <b>1389</b>     | <b>12.67<math>\pm</math>0.90</b>  | <b>7.42<math>\pm</math>1.62</b>  | <b>8.86<math>\pm</math>2.43</b>  | <b>11.76<math>\pm</math>5.46</b>  | <b>11.46<math>\pm</math>1.99</b> | <b>10.17<math>\pm</math>1.78</b> |
| <b>Methyl eugenol</b>               | <b>1409</b>     | <b>1403</b>     | <b>60.21<math>\pm</math>10.95</b> | <b>67.52<math>\pm</math>9.97</b> | <b>56.09<math>\pm</math>7.26</b> | <b>58.33<math>\pm</math>15.69</b> | <b>53.94<math>\pm</math>1.93</b> | <b>66.95<math>\pm</math>2.73</b> |

**Table S3.** Continuation

|                      |      |      |           |           |           |           |           |           |
|----------------------|------|------|-----------|-----------|-----------|-----------|-----------|-----------|
| E-Caryophyllene      | 1421 | 1417 | 4.90±0.53 | 2.56±0.76 | 3.34±1.22 | 4.53±1.99 | 5.66±1.52 | 3.71±2.52 |
| β-Copaene            | 1431 | 1430 | 0.50±0.43 | 0.21±0.12 | 0.25±0.14 | 0.26±0.15 | 0.52±0.23 | 0.24±0.17 |
| δ-Elemene            | 1435 | 1434 | 0.09±0.19 | 0.02±0.05 | 0.03±0.05 | 0.02±0.03 | 0.08±0.09 | 0.06±0.04 |
| E-β-Farnesene        | 1443 | 1454 | 0.03±0.05 | 0.26±0.26 | 0.25±0.17 | 0.38±0.61 | 0.20±0.32 | 0.13±0.26 |
| Guaia-6-9-diene      | 1445 | 1442 | 0.07±0.15 |           | 0.02±0.04 |           | 0.08±0.07 | 0.06±0.04 |
| α-Humulene           | 1454 | 1452 | 0.71±0.56 | 0.12±0.23 | 0.15±0.30 | 0.23±0.24 | 0.73±0.51 | 0.44±0.31 |
| Germacrene D         | 1478 | 1484 | 2.76±1.85 | 2.44±0.90 | 3.01±0.75 | 4.15±2.42 | 4.13±1.32 | 3.48±0.62 |
| δ-Muurolene          | 1482 | 1478 | 1.29±2.57 |           |           |           |           |           |
| β-Selinene           | 1486 | 1489 | 0.07±0.14 |           |           |           |           |           |
| (E)-Methy-isoeugenol | 1491 | 1491 |           |           |           | 0.15±0.31 |           |           |
| Bicyclogermacrene    | 1495 | 1500 | 0.41±0.40 | 0.20±0.16 | 0.20±0.09 | 0.24±0.21 | 0.48±0.28 | 0.25±0.12 |
| δ-Amorphene          | 1504 | 1495 | 0.13±0.26 |           | 0.03±0.07 |           |           | 0.03±0.05 |
| (E-E)-α-Farnesene    | 1511 | 1505 |           |           |           |           | 0.05±0.05 |           |
| Cubebol              | 1513 | 1514 | 0.07±0.14 | 0.06±0.07 | 0.06±0.07 |           | 0.05±0.06 | 0.10±0.16 |
| Eugenol acetate      | 1521 | 1521 | 0.10±0.20 | 0.27±0.27 | 3.16±5.90 | 0.51±0.92 | 1.77±2.56 | 1.11±0.89 |
| Elemol               | 1546 | 1548 | 0.04±0.08 |           |           |           |           | 0.02±0.04 |
| Elemicin             | 1551 | 1555 | 0.95±0.81 | 1.93±0.59 | 1.71±0.35 | 1.53±0.97 | 1.59±0.23 | 1.95±0.98 |
| E-Nerolidol          | 1559 | 1561 | 0.04±0.07 | 0.03±0.04 | 0.02±0.04 | 0.03±0.06 | 0.01±0.03 | 0.04±0.08 |

**Table S3.** Continuation

|                            |      |      |                    |                     |                    |                    |                   |                     |
|----------------------------|------|------|--------------------|---------------------|--------------------|--------------------|-------------------|---------------------|
| Caryophyllene oxide        | 1589 | 1582 | 0.05±0.11          | 0.06±0.08           |                    | 0.02±0.04          |                   | 0.02±0.04           |
| Cubenol                    | 1643 | 1645 | 0.14±0.27          | 0.06±0.09           | 0.03±0.05          |                    |                   | 0.11±0.23           |
| Monoterpene hydrocarbons   |      |      | 7.51±3.88          | 9.53±3.80           | 7.08±3.20          | 8.58±9.20          | 10.13±2.60        | 5.58±2.35           |
| Sesquiterpene hydrocarbons |      |      | <b>24.24±9.05</b>  | <b>13.51±4.48</b>   | <b>16.34±5.50</b>  | <b>21.86±11.37</b> | <b>23.71±6.59</b> | <b>18.99±6.49</b>   |
| Phenylpropanoids           |      |      | <b>62.35±13.21</b> | <b>71.29±12.10*</b> | <b>64.90±19.74</b> | <b>65.04±21.47</b> | <b>61.11±9.26</b> | <b>71.96±6.04**</b> |
| Others                     |      |      | 1.22±1.47          | 0.75±1.30           | 0.85±1.09          | 1.16±0.73          | 1.15±0.72         | 1.08±0.29           |
| <b>Total</b>               |      |      | 95.31±27.61        | 95.08±21.68         | 89.17±29.53        | 96.63±42.77        | 96.09±19.16       | 97.60±15.17         |

**RI <sup>a</sup>:** Retention index calculated; **RI <sup>b</sup>:** Retention Index of Library. **Control:** (control *P. divaricatum*); **AMF:** (*P. divaricatum* inoculated with AMF); **PD + P20:** (*P. divaricatum* with 20 mg of P.dm<sup>-3</sup> of soil); **P200:** (*P. divaricatum* with 200 mg of P.dm<sup>-3</sup> of soil); **P20 + AMF:** (*P. divaricatum* inoculated with AMF and 20 mg of P.dm<sup>-3</sup> of soil); **P200 + AMF:** (*P. divaricatum* inoculated with AMF and 200 mg of P.dm<sup>-3</sup> of soil). \* Statistical difference according to Bonferroni-test ( $p < 0.05$ ). Significance level: \*\* significant, \* little significant.
