# Supplementary material
Source: MDPI journal article supplement (https://www.mdpi.com/2073-4395/12/3/596)
Supplement: s1 [file s1]

**Table S2.** Chemical composition at 60 dpi in *Piper divaricatum* leaves inoculated with AMFs and concentrations of P (means  $\pm$  standard deviation).

| Compound                            | RI <sup>a</sup> | RI <sup>b</sup> | Control                          | AMF                              | P20                              | P200                             | P20 + AMF                        | P200 + AMF                       |
|-------------------------------------|-----------------|-----------------|----------------------------------|----------------------------------|----------------------------------|----------------------------------|----------------------------------|----------------------------------|
| (E)-2-Hexenal                       | 839             | 846             | 0.55 $\pm$ 0.12                  | 0.27 $\pm$ 0.33                  | 0.33 $\pm$ 0.13                  | 0.23 $\pm$ 0.18                  | 0.49 $\pm$ 0.15                  | 0.35 $\pm$ 0.23                  |
| $\alpha$ -Thujene                   | 928             | 924             | 0.01 $\pm$ 0.03                  |                                  |                                  |                                  |                                  | 0.05 $\pm$ 0.04                  |
| $\alpha$ -Pinene                    | 931             | 932             | 1.49 $\pm$ 1.73                  |                                  |                                  |                                  |                                  | 1.30 $\pm$ 2.60                  |
| Sabinene                            | 969             | 969             | 0.01 $\pm$ 0.03                  |                                  |                                  |                                  |                                  | 1.36 $\pm$ 2.72                  |
| $\beta$ -Pinene                     | 968             | 974             | 1.25 $\pm$ 2.17                  |                                  |                                  |                                  |                                  | 0.06 $\pm$ 0.08                  |
| Myrcene                             | 982             | 988             | 0.11 $\pm$ 0.14                  | 0.03 $\pm$ 0.03                  | 0.05 $\pm$ 0.04                  |                                  | 0.08 $\pm$ 0.01                  | 0.22 $\pm$ 0.21                  |
| $\beta$ -Phellandrene               | 1023            | 1025            | 0.54 $\pm$ 0.68                  |                                  | 0.03 $\pm$ 0.06                  |                                  |                                  | 0.64 $\pm$ 0.88                  |
| Z- $\beta$ -Ocimene                 | 1031            | 1032            |                                  | 0.02 $\pm$ 0.04                  | 0.06 $\pm$ 0.05                  | 0.03 $\pm$ 0.06                  | 0.12 $\pm$ 0.03                  | 0.07 $\pm$ 0.08                  |
| <b>E-<math>\beta</math>-Ocimene</b> | 1042            | 1044            | <b>1.62<math>\pm</math>1.27</b>  | <b>3.26<math>\pm</math>0.31</b>  | <b>3.25<math>\pm</math>0.58</b>  | <b>2.74<math>\pm</math>0.23</b>  | <b>4.11<math>\pm</math>0.34</b>  | <b>2.62<math>\pm</math>1.57</b>  |
| Allo-Ocimene                        | 1130            | 1128            |                                  |                                  | 0.01 $\pm$ 0.03                  |                                  | 0.05 $\pm$ 0.01                  | 0.03 $\pm$ 0.04                  |
| $\delta$ -Elemene                   | 1339            | 1335            |                                  |                                  | 0.04 $\pm$ 0.03                  |                                  | 0.04 $\pm$ 0.03                  | 0.09 $\pm$ 0.02                  |
| Eugenol                             | 1358            | 1356            | 0.26 $\pm$ 0.17                  |                                  | 0.49 $\pm$ 0.93                  | 0.21 $\pm$ 0.24                  | 0.09 $\pm$ 0.08                  | 1.13 $\pm$ 0.90                  |
| $\alpha$ -Copaene                   | 1379            | 1374            |                                  |                                  |                                  |                                  |                                  | 0.04 $\pm$ 0.04                  |
| <b><math>\beta</math>-Elemene</b>   | 1396            | 1389            | <b>5.71<math>\pm</math>0.65</b>  | <b>6.97<math>\pm</math>1.29</b>  | <b>7.79<math>\pm</math>0.65</b>  | <b>7.05<math>\pm</math>0.65</b>  | <b>7.78<math>\pm</math>0.96</b>  | <b>7.43<math>\pm</math>0.66</b>  |
| <b>Methyl eugenol</b>               | 1413            | 1403            | <b>84.60<math>\pm</math>4.41</b> | <b>85.42<math>\pm</math>1.80</b> | <b>82.18<math>\pm</math>2.61</b> | <b>85.84<math>\pm</math>0.73</b> | <b>81.80<math>\pm</math>1.56</b> | <b>78.03<math>\pm</math>5.86</b> |
| E-Caryophyllene                     | 1425            | 1417            | 1.71 $\pm$ 0.44                  | 1.89 $\pm$ 0.43                  | 2.58 $\pm$ 0.13                  | 2.03 $\pm$ 0.24                  | 2.58 $\pm$ 0.48                  | 2.69 $\pm$ 0.47                  |
| $\beta$ -Copaene                    | 1434            | 1430            | 0.02 $\pm$ 0.04                  | 0.08 $\pm$ 0.06                  | 0.15 $\pm$ 0.02                  | 0.08 $\pm$ 0.01                  | 0.15 $\pm$ 0.02                  | 0.08 $\pm$ 0.09                  |

**Table S2.** Continuation

|                            |      |      |                   |                   |                   |                   |                   |                   |
|----------------------------|------|------|-------------------|-------------------|-------------------|-------------------|-------------------|-------------------|
| Guaia-6-9-diene            | 1436 | 1442 |                   |                   |                   |                   |                   | 0.10±0.12         |
| $\alpha$ -Humulene         | 1459 | 1452 | 0.04±0.05         | 0.09±0.10         | 0.24±0.05         | 0.14±0.04         | 0.23±0.04         | 0.30±0.08         |
| Germacrene D               | 1487 | 1484 | 0.97±0.43         | 1.47±0.34         | 1.88±0.20         | 1.44±0.31         | 1.78±0.21         | 2.10±0.35         |
| (E)-Methyl-isoeugenol      | 1499 | 1491 | 0.03±0.04         |                   |                   |                   |                   | 0.04±0.08         |
| Bicyclogermacrene          | 1502 | 1500 |                   |                   | 0.09±0.07         |                   | 0.08±0.03         | 0.13±0.02         |
| Eugenol acetate            | 1529 | 1521 |                   |                   | 0.06±0.12         | 0.03±0.03         |                   | 0.16±0.12         |
| Elemicin                   | 1559 | 1555 | 0.20±0.06         | 0.27±0.05         | 0.32±0.08         | 0.17±0.04         | 0.33±0.05         | 0.55±0.17         |
| Monoterpene hydrocarbons   |      |      | 5.03±6.04         | 3.31±0.38         | 3.4±0.74          | 2.77±0.28         | 4.36±0.39         | 6.33±8.21         |
| Sesquiterpene hydrocarbons |      |      | 8.45±1.61         | 10.49±2.22        | 12.77±1.14        | 10.73±1.26        | 12.63±1.78        | 12.95±1.85        |
| Phenylpropanoids           |      |      | <b>85.17±4.69</b> | <b>85.69±1.86</b> | <b>83.05±3.73</b> | <b>86.25±1.04</b> | <b>82.21±1.69</b> | <b>79.89±7.11</b> |
| Others                     |      |      | 0.55±0.12         | 0.27±0.33         | 0.33±0.13         | 0.23±0.18         | 0.49±0.15         | 0.35±0.23         |
| <b>Total</b>               |      |      | 99.21±12.46       | 99.75±4.79        | 99.55±5.75        | 99.98±2.76        | 99.69±4.00        | 99.52±17.41       |

**RI**<sup>a</sup>: Retention index calculated; **RI**<sup>b</sup>: Retention Index of Library. **Control**: (control *P. divaricatum*); **AMF**: (*P. divaricatum* inoculated with AMF); **P20**: (*P. divaricatum* with 20 mg of P.dm<sup>-3</sup> of soil); **P200**: (*P. divaricatum* with 200 mg of P.dm<sup>-3</sup> of soil); **P20 + AMF**: (*P. divaricatum* inoculated with AMF and 20 mg of P.dm<sup>-3</sup> of soil); **P200 + AMF**: (*P. divaricatum* inoculated with AMF and 200 mg of P.dm<sup>-3</sup> of soil). \* Statistical difference according to Bonferroni-test ( $p < 0.05$ ).
