# Supplementary material
Source: MDPI journal article supplement (https://www.mdpi.com/2073-4395/12/3/596)
Supplement: s1 [file s1]

**Table S1.** Chemical composition at 30 dpi in *Piper divaricatum* leaves inoculated with AMFs and concentrations of P (mean  $\pm$  standard deviation).

| Compound                            | RI <sup>a</sup> | RI <sup>b</sup> | Control                            | AMF                                | P20                                  | P200                                | P20 + AMF                           | P200 + AMF                          |
|-------------------------------------|-----------------|-----------------|------------------------------------|------------------------------------|--------------------------------------|-------------------------------------|-------------------------------------|-------------------------------------|
| (E)-2-Hexenal                       | 839             | 846             | 0.16 $\pm$ 0.28                    | 0.63 $\pm$ 0.16                    | 0.11 $\pm$ 0.12                      |                                     | 0.32 $\pm$ 0.24                     | 0.07 $\pm$ 0.05                     |
| $\alpha$ -Pinene                    | 932             | 932             | 2.40 $\pm$ 2.09                    | 0.02 $\pm$ 0.04                    |                                      |                                     |                                     |                                     |
| Sabinene                            | 971             | 969             | 1.20 $\pm$ 2.07                    |                                    |                                      |                                     |                                     |                                     |
| $\beta$ -Pinene                     | 981             | 974             | 1.59 $\pm$ 2.51                    | 0.01 $\pm$ 0.02                    |                                      |                                     |                                     |                                     |
| Myrcene                             | 982             | 988             | 0.12 $\pm$ 0.16                    | 0.07 $\pm$ 0.04                    | 0.03 $\pm$ 0.02                      | 0.02 $\pm$ 0.03                     | 0.06 $\pm$ 0.01                     | 0.04 $\pm$ 0.04                     |
| $\beta$ -Phellandrene               | 1023            | 1025            | 0.06 $\pm$ 0.08                    | 0.05 $\pm$ 0.09                    | 0.02 $\pm$ 0.02                      | 0.01 $\pm$ 0.02                     | 0.02 $\pm$ 0.04                     | 0.02 $\pm$ 0.03                     |
| Limonene                            | 1023            | 1024            | 0.59 $\pm$ 0.51                    |                                    |                                      |                                     |                                     |                                     |
| Silvestrene                         | 1030            | 1025            | 0.04 $\pm$ 0.03                    |                                    |                                      |                                     |                                     |                                     |
| Z- $\beta$ -Ocimene                 | 1030            | 1032            | 0.03 $\pm$ 0.05                    | 0.08 $\pm$ 0.07                    | 0.04 $\pm$ 0.04                      |                                     | 0.06 $\pm$ 0.04                     | 0.03 $\pm$ 0.06                     |
| <b>E-<math>\beta</math>-Ocimene</b> | <b>1042</b>     | <b>1044</b>     | <b>1.72 <math>\pm</math> 0.88</b>  | <b>3.92 <math>\pm</math> 1.22</b>  | <b>2.79 <math>\pm</math> 0.51</b>    | <b>2.59 <math>\pm</math> 0.47</b>   | <b>3.44 <math>\pm</math> 0.61</b>   | <b>3.11 <math>\pm</math> 0.77</b>   |
| <i>Allo</i> -Ocimene                | 1129            | 1128            | 0.01 $\pm$ 0.02                    | 0.05 $\pm$ 0.01                    | 0.01 $\pm$ 0.01                      | 0.01 $\pm$ 0.02                     | 0.02 $\pm$ 0.02                     | 0.02 $\pm$ 0.03                     |
| $\delta$ -Elemene                   | 1340            | 1335            | 0.06 $\pm$ 0.04                    | 0.03 $\pm$ 0.01                    | 0.01 $\pm$ 0.01                      |                                     | 0.01 $\pm$ 0.01                     | 0.02 $\pm$ 0.03                     |
| Eugenol                             | 1360            | 1356            | 1.18 $\pm$ 2.05                    | 0.23 $\pm$ 0.35                    | 0.96 $\pm$ 1.91                      |                                     | 1.25 $\pm$ 2.51                     | 1.67 $\pm$ 2.19                     |
| $\alpha$ -Copaene                   | 1379            | 1374            | 0.02 $\pm$ 0.03                    | 0.12 $\pm$ 0.11                    |                                      |                                     |                                     |                                     |
| <b><math>\beta</math>-Elemene</b>   | <b>1396</b>     | <b>1389</b>     | <b>6.27 <math>\pm</math> 1.12</b>  | <b>5.49 <math>\pm</math> 0.45</b>  | <b>5.62 <math>\pm</math> 0.93</b>    | <b>6.36 <math>\pm</math> 0.22</b>   | <b>6.05 <math>\pm</math> 1.76</b>   | <b>5.64 <math>\pm</math> 0.65</b>   |
| <b>Methyl eugenol</b>               | <b>1410</b>     | <b>1403</b>     | <b>76.07 <math>\pm</math> 2.57</b> | <b>85.09 <math>\pm</math> 3.62</b> | <b>87.51 <math>\pm</math> 2.95**</b> | <b>87.00 <math>\pm</math> 0.58*</b> | <b>84.86 <math>\pm</math> 4.20*</b> | <b>84.32 <math>\pm</math> 4.83*</b> |
| E-Caryophyllene                     | 1426            | 1417            | 1.98 $\pm$ 0.69                    | 1.26 $\pm$ 0.16                    | 1.53 $\pm$ 0.40                      | 1.89 $\pm$ 0.16                     | 1.54 $\pm$ 0.47                     | 1.73 $\pm$ 0.23                     |

**Table S1.** Continuation

|                            |      |      |                                     |                                    |                                     |                                     |                                     |                                     |
|----------------------------|------|------|-------------------------------------|------------------------------------|-------------------------------------|-------------------------------------|-------------------------------------|-------------------------------------|
| $\beta$ -Copaene           | 1436 | 1430 | 0.07 $\pm$ 0.04                     | 0.07 $\pm$ 0.01                    | 0.04 $\pm$ 0.04                     | 0.08 $\pm$ 0.01                     | 0.06 $\pm$ 0.08                     | 1.42 $\pm$ 0.14                     |
| $\gamma$ -Elemene          | 1439 | 1434 | 0.01 $\pm$ 0.01                     |                                    |                                     |                                     |                                     |                                     |
| $\alpha$ -Humulene         | 1460 | 1452 | 0.13 $\pm$ 0.04                     | 0.10 $\pm$ 0.02                    | 0.06 $\pm$ 0.07                     |                                     |                                     |                                     |
| Germacrene D               | 1486 | 1484 | 1.04 $\pm$ 0.29                     | 1.01 $\pm$ 0.15                    | 0.99 $\pm$ 0.41                     | 1.07 $\pm$ 0.08                     | 1.19 $\pm$ 0.58                     | 1.22 $\pm$ 1.54                     |
| $\beta$ -Selinene          | 1493 | 1489 | 0.02 $\pm$ 0.03                     |                                    |                                     |                                     |                                     |                                     |
| (E)-Methyl-isoeugenol      | 1499 | 1491 | 0.08 $\pm$ 0.08                     |                                    |                                     |                                     |                                     |                                     |
| Bicyclogermacrene          | 1502 | 1500 | 0.05 $\pm$ 0.09                     |                                    |                                     |                                     |                                     |                                     |
| Eugenol acetate            | 1531 | 1521 | 0.77 $\pm$ 1.23                     | 1.46 $\pm$ 2.45                    | 0.01 $\pm$ 0.01                     |                                     | 0.45 $\pm$ 0.91                     |                                     |
| Elemicin                   | 1559 | 1555 | 0.13 $\pm$ 0.16                     | 0.19 $\pm$ 0.11                    | 0.18 $\pm$ 0.10                     | 0.21 $\pm$ 0.06                     | 0.23 $\pm$ 0.04                     | 0.24 $\pm$ 0.11                     |
| (E)-Nerolidol              | 1567 | 1561 | 0.03 $\pm$ 0.05                     |                                    |                                     |                                     |                                     |                                     |
| Caryophyllene oxide        | 1590 | 1582 | 0.01 $\pm$ 0.01                     |                                    |                                     |                                     |                                     |                                     |
| Selin-11-en-4-alpha-ol     | 1660 | 1658 | 0.03 $\pm$ 0.05                     |                                    |                                     |                                     |                                     |                                     |
| Monoterpene hydrocarbons   |      |      | 7.72 $\pm$ 8.38                     | 4.20 $\pm$ 1.48                    | 2.87 $\pm$ 0.60                     | 2.63 $\pm$ 0.53                     | 3.59 $\pm$ 0.73                     | 3.22 $\pm$ 0.93                     |
| Sesquiterpene hydrocarbons |      |      | 9.70 $\pm$ 2.49                     | 8.07 $\pm$ 0.89                    | 8.24 $\pm$ 1.86                     | 9.39 $\pm$ 0.48                     | 8.84 $\pm$ 2.90                     | 8.81 $\pm$ 1.05                     |
| Phenylpropanoids           |      |      | <b>78.23 <math>\pm</math> 6.10</b>  | <b>86.97 <math>\pm</math> 6.53</b> | <b>88.65 <math>\pm</math> 4.97*</b> | <b>87.21 <math>\pm</math> 0.64*</b> | <b>86.80 <math>\pm</math> 7.65*</b> | <b>87.45 <math>\pm</math> 8.66*</b> |
| Others                     |      |      | 0.16 $\pm$ 0.28                     | 0.63 $\pm$ 0.16                    | 0.10 $\pm$ 0.12                     | 0.00 $\pm$ 0.00                     | 0.32 $\pm$ 0.24                     | 0.07 $\pm$ 0.05                     |
| <b>Total</b>               |      |      | <b>95.82 <math>\pm</math> 17.27</b> | <b>99.88 <math>\pm</math> 9.06</b> | <b>99.87 <math>\pm</math> 7.56</b>  | <b>99.23 <math>\pm</math> 1.65</b>  | <b>99.55 <math>\pm</math> 11.52</b> | <b>99.55 <math>\pm</math> 10.69</b> |

**RI<sup>a</sup>**: Retention index calculated; **RI<sup>b</sup>**: Retention Index of Library. **Control**: (control *P. divaricatum*); **AMF**: (*P. divaricatum* inoculated with AMF); **P20**: (*P. divaricatum* with 20 mg of P.dm<sup>-3</sup> of soil); **P200**: (*P. divaricatum* with 200 mg of P.dm<sup>-3</sup> of soil); **P20 + AMF**: (*P. divaricatum* inoculated with AMF and 20 mg of P.dm<sup>-3</sup> of soil); **P200 + AMF**: (*P. divaricatum* inoculated with AMF and 200 mg of P.dm<sup>-3</sup> of soil). \* Statistical difference according to Bonferroni-test ( $p < 0.05$ ). Significance level: \*\* significant, \* little significant.
